# Supplementary material
Source: Royal Society of Chemistry journal article supplement (doi:10.1039/d6fd00036c)
Supplement: d6fd00036c1.pdf [file d6fd00036c1.pdf]

## Supplementary Information

### Phase Regulation via Dual Additives for Pure-blue Emitting Quasi-2D Perovskite Light Emitting Diodes

Jinu Park,<sup>\*a</sup> Seoyeon Park,<sup>\*a</sup> Seongju Park,<sup>a</sup> Hyunjin Cho,<sup>b</sup> Doh C. Lee<sup>b</sup> and  
Byungha Shin<sup>†a</sup>

a) Department of Materials Science and Engineering, Korea Advanced Institute of Science and Technology (KAIST), Dae-jeon 34141, Republic of Korea

b) Department of Chemical and Biomolecular Engineering, Korea Advanced Institute of Science and Technology (KAIST), Dae-jeon 34141, Republic of Korea

<sup>†</sup>Corresponding authors: byungha@kaist.ac.kr

| TAS           | $n = 2$ (ps)         |                       | $n = 3$ (ps)         |                       | $n = 4$ (ps)         |                       | $n \geq 5$ (ps)      |                       |
|---------------|----------------------|-----------------------|----------------------|-----------------------|----------------------|-----------------------|----------------------|-----------------------|
|               | $\tau_{\text{Rise}}$ | $\tau_{\text{Decay}}$ | $\tau_{\text{Rise}}$ | $\tau_{\text{Decay}}$ | $\tau_{\text{Rise}}$ | $\tau_{\text{Decay}}$ | $\tau_{\text{Rise}}$ | $\tau_{\text{Decay}}$ |
| Reference     | 0.18                 | 0.53                  | 0.16                 | 0.36                  | 0.16                 | 1.36                  | 0.32                 | 149                   |
| PPNCI         | 0.12                 | 0.24                  | 0.10                 | 0.33                  | 0.14                 | 0.33                  | 0.18                 | 53                    |
| PPNCI + CsTFA | 0.16                 | 0.13                  | 0.13                 | 0.25                  | 0.11                 | 0.33                  | 0.13                 | 44                    |

**Table S1.** Decay and formation constants for each condition at specific wavelengths corresponding to  $n = 2, 3, 4,$  and  $\geq 5$  Phases.

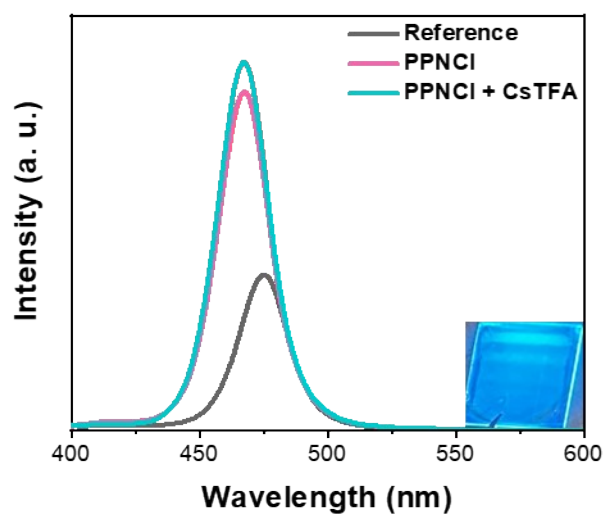

**Figure S1.** PL characteristics of perovskite films under reference, PPNCI, and PPNCI + CsTFA conditions; inset: perovskite film (PPNCI + CsTFA) under UV illumination.

| Samples       | Peak (nm) | FWHM (nm) | PLQY (%) |
|---------------|-----------|-----------|----------|
| Reference     | 475       | 23        | 17       |
| PPNCI         | 467       | 22        | 30       |
| PPNCI + CsTFA | 467       | 22        | 32       |

**Table S2.** PL characterization for each condition.

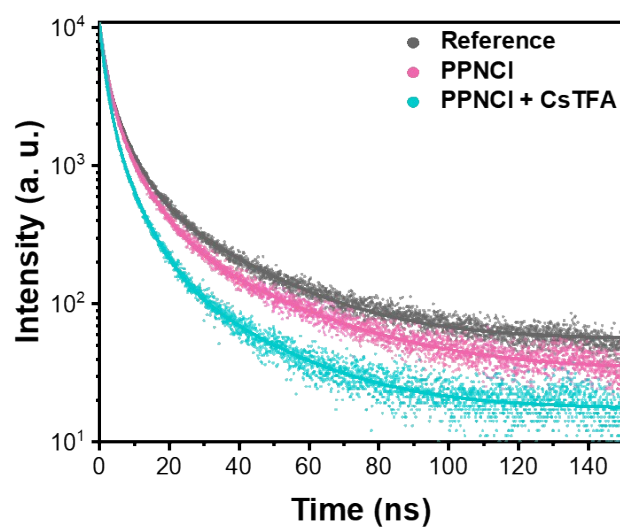

**Figure S2.** Time-resolved photoluminescence measurements for each condition.

| TRPL          | PLQY (%) | $\tau_{\text{Decay}}$ (ns) |      |    |
|---------------|----------|----------------------------|------|----|
|               |          | Avg.                       | Rad. | NR |
| Reference     | 17       | 12.2                       | 72   | 15 |
| PPNCI         | 30       | 11.5                       | 38   | 16 |
| PPNCI + CsTFA | 32       | 7.7                        | 24   | 11 |

$$y = A_1 \times \exp(-x/\tau_1) + A_2 \times \exp(-x/\tau_2) + A_3 \times \exp(-x/\tau_3)$$

$$\tau_{avg} = \frac{\sum A_i \tau_i^2}{\sum A_i \tau_i} = \frac{1}{K_r + K_{nr}}$$

$$PLQY = \frac{K_r}{K_r + K_{nr}}, K_r = \frac{1}{\tau_{Rad.}}, K_{nr} = \frac{1}{\tau_{NR}}$$

**Table S3.** PL decay times for each condition at specific wavelengths corresponding to the PL emission Peak. The reference condition corresponds to a wavelength of 475 nm, while PPNCI and PPNCI + CsTFA conditions correspond to 467 nm. ‘Avg.’ means average recombination, ‘Rad.’ means radiative recombination, and ‘NR’ means non-radiative recombination.

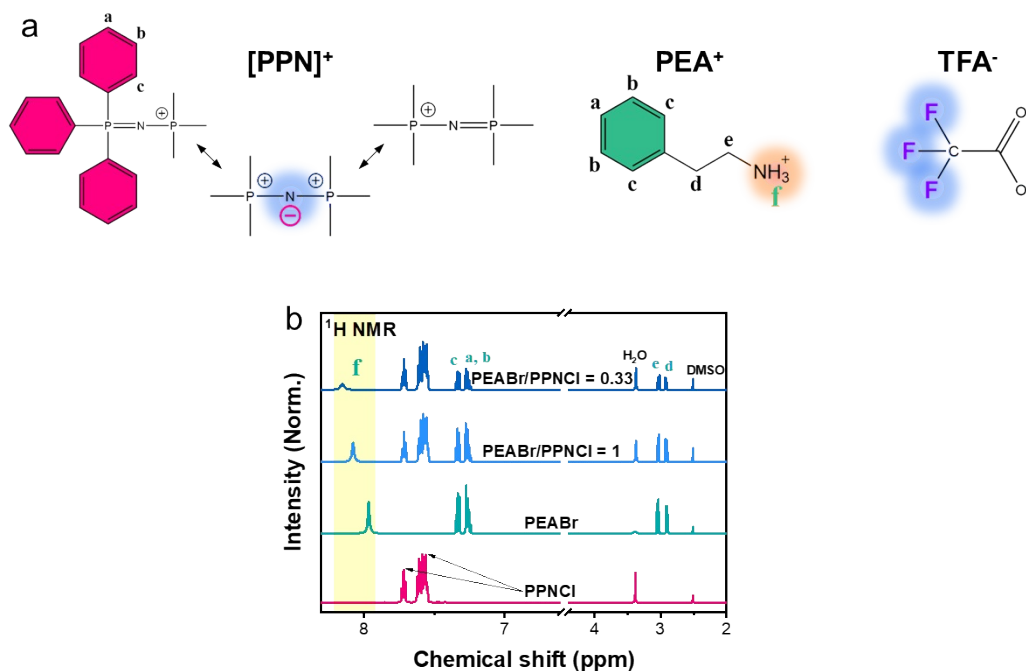

**Figure S3.** Hydrogen atoms in PEABr influenced by additives. (a) Schematic representation of the [PPN]<sup>+</sup>, PEA<sup>+</sup>, and TFA<sup>-</sup> structures. (b) <sup>1</sup>H NMR signals of PEABr at varying ratios of PPNCI to PEABr. The yellow ‘f’ region in (a) and (b) corresponds to the <sup>1</sup>H NMR signals of the ammonium group in PEABr.

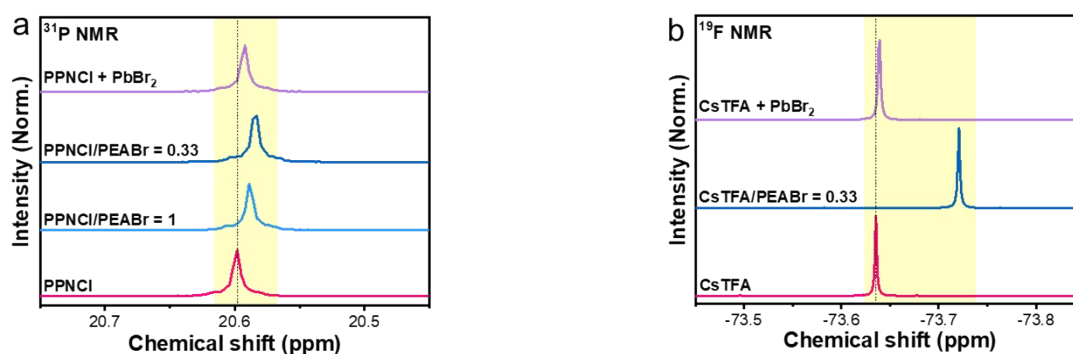

**Figure S4.** Interaction between spacers and additives. (a) <sup>31</sup>P NMR spectrum of PPNCI with and without PEABr. (b) <sup>19</sup>F NMR spectrum of CsTFA with and without PEABr.

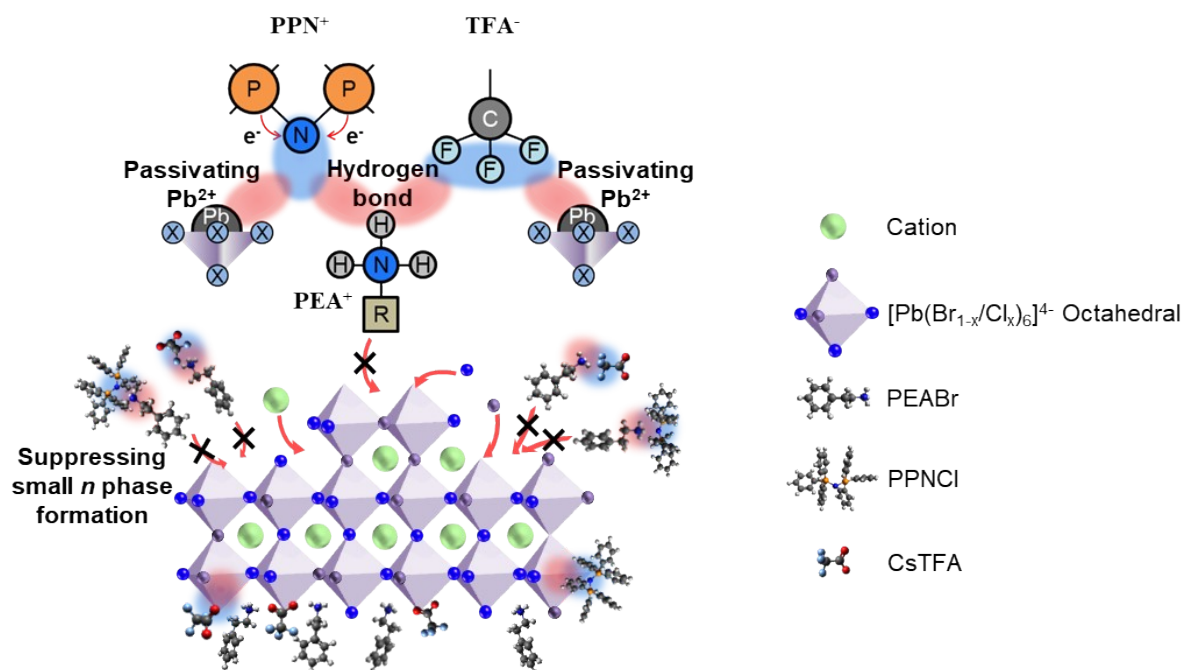

**Figure S5.** Schematic illustrating the interactions between PEA<sup>+</sup>, [PPN]<sup>+</sup>, and TFA<sup>-</sup>, and the mechanism for *n*-phase regulation. 'R' group denotes the phenethyl group (C<sub>6</sub>H<sub>5</sub>CH<sub>2</sub>CH<sub>2</sub>-).

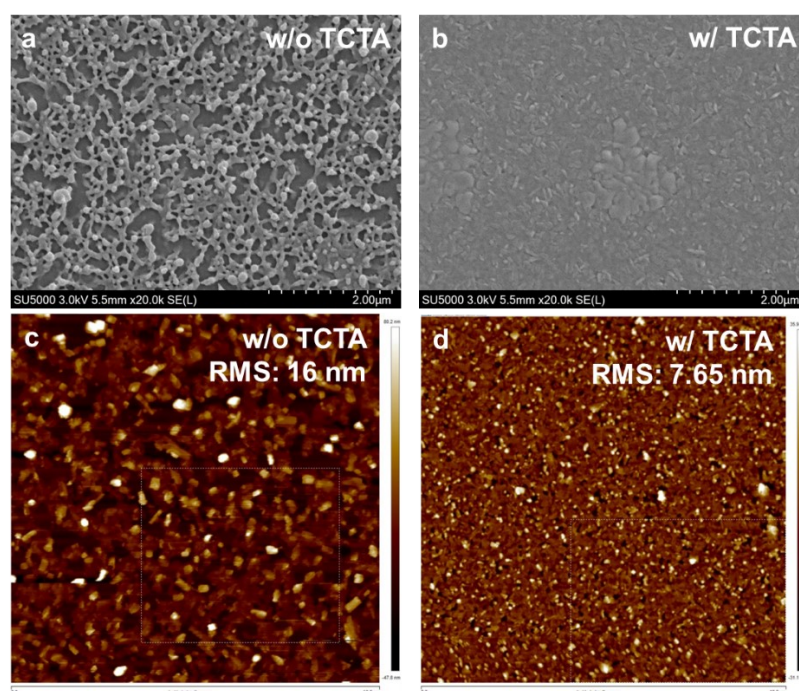

**Figure S6.** SEM top-view images of perovskite films (a) without a TCTA layer and (b) on a TCTA layer. AFM images of the perovskite layer (c) without a TCTA layer and (d) on a TCTA layer.

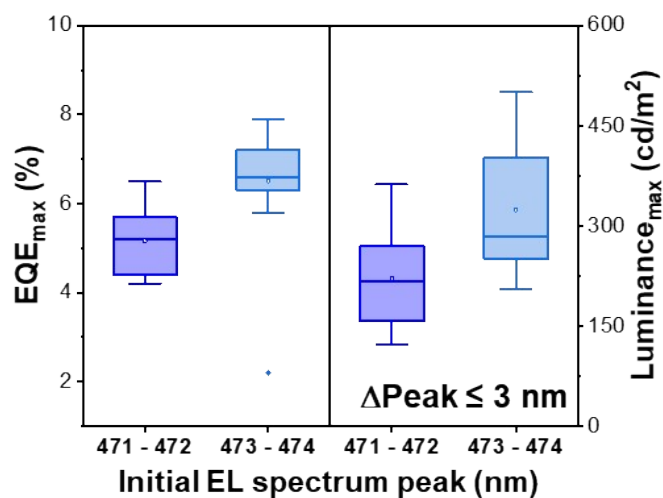

**Figure S7.** Statistical LED performance plot of 22 devices satisfying EL peak shift conditions below 3 nm.

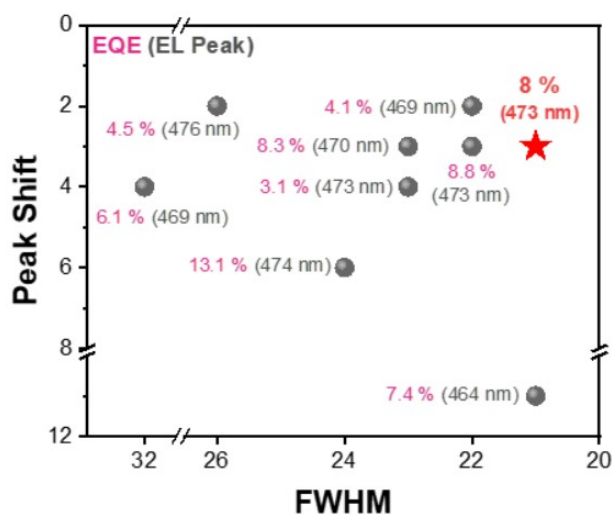

**Figure S8.** LED performance based on pure-blue emitting quasi-2D mixed halide perovskite. A 2D scatter plot correlating the spectral drift (Peak Shift) and emission linewidth (FWHM) of the corresponding devices. The red star highlights the optimized device from this work.

| <b>Year</b> | <b>EL Peak<sub>0</sub><br/>(nm)</b> | <b>FWHM<sub>0</sub><br/>(nm)</b> | <b>EQE<sub>max</sub><br/>(%)</b> | <b>DPeak<br/>(nm)</b> | <b>Ref.</b>          |
|-------------|-------------------------------------|----------------------------------|----------------------------------|-----------------------|----------------------|
| <b>2020</b> | 473                                 | 23                               | 8.8                              | 3                     | [1]                  |
| <b>2021</b> | 469                                 | 22                               | 4.1                              | 2                     | [2]                  |
| <b>2021</b> | 473                                 | 23                               | 3.1                              | 4                     | [3]                  |
| <b>2022</b> | 469                                 | 32                               | 6.1                              | 4                     | [4]                  |
| <b>2024</b> | 477                                 | 29                               | 4                                | -                     | [5]                  |
| <b>2024</b> | 470                                 | 23                               | 8.3                              | 3                     | [6]                  |
| <b>2024</b> | 464                                 | 21                               | 7.4                              | > 10                  | [7]                  |
|             | 473                                 | 24                               | 13.1                             | > 5                   |                      |
| <b>2025</b> | 476                                 | 26                               | 4.5                              | 2                     | [8]                  |
| <b>2026</b> | <b>473</b>                          | <b>21</b>                        | <b>8</b>                         | <b>3</b>              | <b>This<br/>work</b> |

**Table S4.** Summary of the key parameters of pure-blue emitting quasi-2D mixed halide perovskite LEDs in Figure S8: electroluminescence (EL) characteristics, external quantum efficiency (EQE), and spectral stability ( $\Delta$ Peak).

## Reference

1. C. Wang, D. Han, J. Wang, Y. Yang, X. Liu, S. Huang, X. Zhang and S. Chang, *Nat. Commun.*, 2020, **11**, 6428.
2. K. Shen, H. Deng, Y. Shen, M. Guo, W. Cai, M. U. Ali, P. Liu, H.-L. Yip, Y.-Q. Li and J.-X. Tang, *Adv. Funct. Mater.*, 2021, **31**, 2006736.
3. F. Zhang, X. Zhang, C. Wang, M. Sun, X. Luo, Y. Yang, S. Chang, D. Zhang, *et al.*, *Nano Energy*, 2021, **79**, 105486.
4. X. Bai, H. Li, Y. Peng, G. Dong, *et al.*, *J. Am. Chem. Soc.*, 2022, **144**, 18470–18478.
5. Z. Bao, S. Yu, X. Guo, *et al.*, *Chem. Eng. J.*, 2024, **482**, 148875.
6. M.-S. Kim, P. Sadhukhan and J.-M. Myoung, *Adv. Funct. Mater.*, 2024, **34**, 2309436.
7. S. Yuan, L. Dai, Y. Sun, F. Auras, Y. H. Zhou, R. Z. An, Y. Liu, C. Ding, C. Cassidy, X. Tang, S. C. Dong, H. B. Kang, K. Chen, X. Liu, Z. F. Ye, Y. Zhao, C. Adachi, L. S. Liao, N. C. Greenham, Y. Qi, S. D. Stranks, L. S. Cui and R. H. Friend, *Nat. Photonics*, 2024, **18**, 425–431.
8. P. Pang, Z. Zhang, B. Wang, T. Sheng and G. Xing, *Nanoscale*, 2025, **17**, 9541–9551.
